# Supplementary material for: Synergistic O2/O3 Phase Engineering Suppresses Voltage Fade and Enhances Cycling Stability in Lithium-Rich Layered Oxides
Source: Research Square preprint supplement (doi:10.21203/rs.3.rs-7677792/v1), 2025-10-08
Supplement: Supplementary file 1 [file 2a304f3c8d504803df4df3e8.docx]

**Supporting information**

**Figure S1**. XRD pattern of 0.5O2/0.5O3 and Rietveld refinement results.

**Figure S2**. XRD pattern of 0.7O2/0.3O3 and Rietveld refinement results.

**Figure S3**. XRD pattern of 0.9O2/0.1O3 and Rietveld refinement results.

**Table S1**. Refined crystallographic parameters by Rietveld analysis for O2 phase.

| Atom | x | y | z | Frac. |
| --- | --- | --- | --- | --- |
| Li1 | 0.3333 | 0.6667 | 0.2413 | 0.6 |
| Li2 | 0.6667 | 0.3333 | 0 | 0.2 |
| Ni | 0.6667 | 0.3333 | 0 | 0.1333 |
| Co | 0.6667 | 0.3333 | 0 | 0.2333 |
| Mn | 0.6667 | 0.3333 | 0 | 0.5334 |
| O1 | 0.6667 | 0.3333 | 0 | 1 |
| O2 | 0 | 0 | 0 | 1 |

**Table S2**. Refined crystallographic parameters by Rietveld analysis for O3 phase.

| Atom | x | y | z | Frac. |
| --- | --- | --- | --- | --- |
| Li1 | 0 | 0 | 0 | 0.974 |
| Li2 | 0 | 0 | 0.5 | 0.167 |
| Li3 | 0 | 0 | 0.5 | 0.026 |
| Ni | 0 | 0 | 0.5 | 0.1333 |
| Co | 0 | 0 | 0.5 | 0.2333 |
| Mn | 0 | 0 | 0.5 | 0.5334 |
| O | 0 | 0 | 0.2444 | 1 |

**Table S3**. ICP elemental composition results of samples before and after molten salt ion exchange

| Samples | Li | Na | Mn | Co | Ni |
| --- | --- | --- | --- | --- | --- |
| 0.1O2/0.9O3 | 8.66% | 1.87% | 30.58% | 8.41% | 5.68% |
| 0.3O2/0.7O3 | 7.12% | 4.85% | 30.28% | 8.36% | 5.70% |
| 0.5O2/0.5O3 | 5.58% | 7.42% | 30.61% | 8.42% | 5.69% |
| 0.7O2/0.3O3 | 4.11% | 10.56% | 31.65% | 8.76% | 5.99% |
| 0.9O2/0.1O3 | 2.37% | 12.39% | 30.75% | 8.57% | 5.82% |
| 0.1P2/0.9O3 | 9.68% | 0.19% | 32.54% | 8.96% | 6.13% |
| 0.3P2/0.7O3 | 9.01% | 0.09% | 32.40% | 9.07% | 6.15% |
| 0.5P2/0.5O3 | 8.38% | 0.08% | 33.08% | 9.19% | 6.25% |
| 0.7P2/0.3O3 | 7.79% | 0.03% | 34.21% | 9.41% | 6.40% |
| 0.9P2/0.1O3 | 7.06% | 0.04% | 33.87% | 9.49% | 6.48% |

**Figure S4**. Mn 3s spectra of samples with different O2/O3 ratios

**Figure S5**. Specific energy curves of samples with different O2/O3 ratios.

**Figure S6**. Charge-discharge curves and corresponding dQ/dV curves of 0.5O2/0.5O3 and 0.7O2/0.3O3 at the 3rd, 50th, 100th, 150th, and 300th cycles
